# Supplementary material
Source: Elsevier journal article supplement (https://rcastoragev2.blob.core.windows.net/8cc437675fc4d865e867c1056da64f19/mmc1.pdf)
Supplement: mmc1 [file mmc1.pdf]

In Vivo Imaging of *oskar* mRNATransport Reveals the Mechanism  
of Posterior Localization

Vitaly L. Zimyanin, Katsiaryna Belaya, Jacques Pecreaux, Michael J. Gilchrist,  
Alejandra Clark, Ilan Davis, and Daniel St Johnston

**Table S1. Comparison of the dynamics of GFP-Stau and *oskMS2*-GFP particle movement**

| Phenotype                                                     | Number of tracks | Number of movies | Track distance, $\mu\text{m}$ | Average speed, $\mu\text{m/s}$ | Percent tracks to anterior | Percent tracks to posterior | net posterior displacement, $\mu\text{m/s}$ |
|---------------------------------------------------------------|------------------|------------------|-------------------------------|--------------------------------|----------------------------|-----------------------------|---------------------------------------------|
| wt (GFP:Stau)                                                 | 491              | 28               | 2.43 (0.07)                   | 0.45 (0.01)                    | 43.6                       | 56.4                        | 0.03 (0.01)<br>p<0.01 <sup>a</sup>          |
| wt<br>( <i>oskMS2</i> GFP)                                    | 272              | 9                | 2.85 (0.11)                   | 0.47 (0.01)<br>n.s.            | 43.0                       | 57.0                        | 0.04 (0.02)<br>n.s, p<0.05 <sup>a</sup>     |
| <i>oskA87/Df</i><br>( <i>oskMS2</i> GFP)                      | 224              | 4                | 2.34 (0.11)                   | 0.60 (0.01)***<br>p<0.001      | 42.0                       | 58.0                        | 0.04 (0.03)<br>n.s.                         |
| wt (GFP:Stau)<br>Anterior oriented                            | 214              |                  | 2.58 (0.12)                   | 0.47 (0.01)                    |                            |                             |                                             |
| wt (GFP:Stau)<br>Posterior oriented                           | 277              |                  | 2.32 (0.08)                   | 0.44 (0.01)*<br>p=0.02         |                            |                             |                                             |
| wt<br>( <i>oskMS2</i> GFP)<br>Anterior oriented               | 122              |                  | 2.85 (0.18)                   | 0.47 (0.02)                    |                            |                             |                                             |
| wt<br>( <i>oskMS2</i> GFP)<br>Posterior oriented              | 150              |                  | 2.85 (0.12)                   | 0.47 (0.01)<br>n.s.            |                            |                             |                                             |
| wt (GFP:Stau)<br>anterior half of<br>the oocyte               | 84               | 22               | 2.80 (0.02)                   | 0.54 (0.02)                    | 44.1                       | 55.9                        | 0.05 (0.04)                                 |
| wt (GFP:Stau)<br>posterior half of<br>the oocyte              | 407              | 24               | 2.35 (0.07)                   | 0.43(0.01)***<br>p<0.001       | 43.5                       | 56.5                        | 0.03 (0.02)<br>n.s.                         |
| wt<br>( <i>oskMS2</i> GFP)<br>anterior half of<br>the oocyte  | 108              | 7                | 2.93 (0.19)                   | 0.54 (0.02)                    | 47.3                       | 52.7                        | 0.001 (0.03)                                |
| wt<br>( <i>oskMS2</i> GFP)<br>posterior half of<br>the oocyte | 164              | 2                | 2.80 (0.12)                   | 0.43 (0.01)***<br>p<0.001      | 49.6                       | 60.4                        | 0.06 (0.02)<br>n.s                          |

Values shown are means for all particles that move faster than cytoplasmic flows ( $> 0.1 \mu\text{m/s}$ ) with the SEM in the parentheses. The significance scores indicate whether the values for a particular experiment are significantly different from those of the top experiment in each segment of the Table defined by heavy black lines. Statistically significant differences between populations are shown with asterisks: \*  $p \leq 0.05$ ; \*\*  $p \leq 0.01$ ; \*\*\*  $p \leq 0.001$ . Corresponding p values are shown in the parenthesis. <sup>a</sup> probability that the net posterior displacement is larger than 0.

**Figure S1. *oskMS2* RNA localizes in a *osk* mRNA null mutant background.**

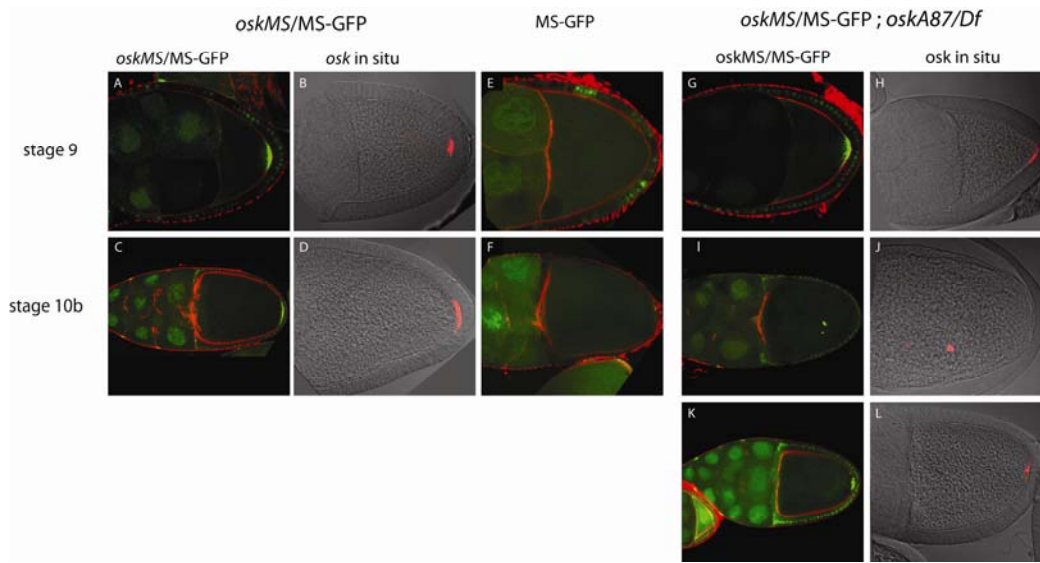

(A-D) *oskMS2/MS2-GFP* localizes to the posterior of the oocyte in wild-type. (A and C) GFP fluorescence; (B and D) *in situ* hybridization to *osk* mRNA. (E and F) MS2-GFP localizes to the nuclei in the absence of *oskMS2* mRNA.

(G-L) *oskMS2* and *MS2-GFP* were crossed into an *osk* mRNA null mutant background (*osk<sup>A87</sup>/Df(3R)p<sup>XT103</sup>*). (G,H) *oskMS2* RNA rescues the early oogenesis arrest of the *osk* RNA null mutant, and localizes normally to the posterior pole of the oocyte during stages 9-10. (I-L). *oskMS2* RNA falls off the posterior pole in 80% of *osk<sup>A87</sup>/Df(3R)p<sup>XT103</sup>* oocytes after stage 10b, indicating that it is not anchored properly in the absence of the endogenous mRNA. (G,I, and K) GFP fluorescence; (H,J, and L) *in situ* hybridization to *osk* mRNA. In (A,C,E,F,G,I, and K), actin is stained with Rhodamine-Phalloidin.

Figure S2

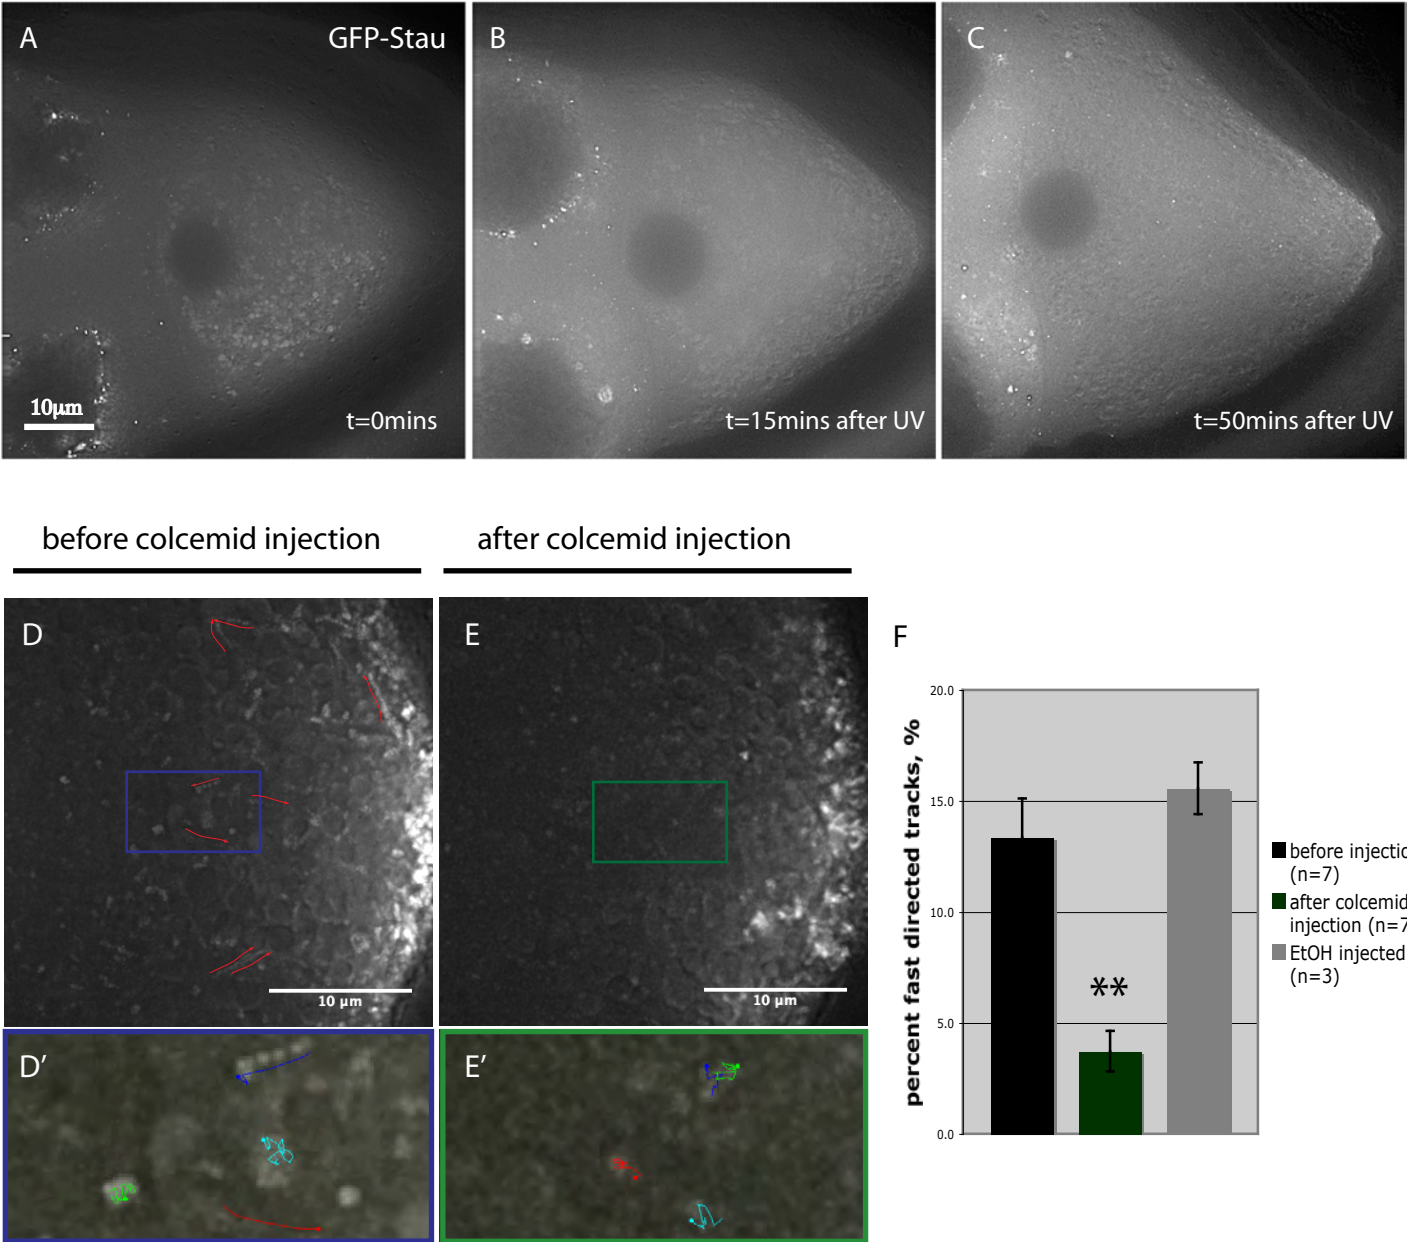

**Figure S2 The movement of *osk* mRNA particles is microtubule-dependent**

(A) Depolymerization of the microtubules with colcemid prevents the posterior accumulation of GFP-Stau and abolishes almost all fast particle movements in the oocyte.

(B and C) Upon inactivation of the colcemid with a short UV-pulse, GFP-Stau particles resume their movements, with visible accumulation of GFP-Stau at the oocyte posterior after 50mins.

(D and E) Injection of the microtubule-depolymerizing drug, colchicine, abolishes almost all fast particle movements. (D) An overlay of 60 frames to show fast *osk*-MS2/MS2-GFP particle movements in the oocyte before injection. The red arrows indicate fast tracks. (D') A close up of the blue box in (D) showing two fast (dark blue and red) and two diffusive tracks (light blue and green). (E) The number of fast particle movements is significantly reduced 15 min after colchicine injection, and none can be seen in the overlay of 25 frames (E) or in the close up of the area highlighted by the green rectangle (E').

(F) Quantification of the number of fast particle movements in the oocyte before and after colchicine injection.
